# Supplementary material
Source: publisher figshare collection journal article supplement (https://brill.figshare.com/ndownloader/files/30575868)
Supplement: Supplementary file 1 [file 30575868]

## **Does gut microbiota regulate brooding in geese?**

**Guojun Liu<sup>1,\*</sup>, Zhenhua Guo<sup>1,\*,\*\*\*</sup>, Di Liu<sup>1,\*\*</sup>, He Meng<sup>2,\*\*</sup>, Yuming Zheng<sup>2</sup>,  
Xiuhua Zhao<sup>1</sup>, Lihong Gu<sup>3</sup>, Zhifeng Chen<sup>4</sup>, Xingyong Chen<sup>5</sup>, Manyu Li<sup>1</sup>, Jinyan  
Sun<sup>1</sup>, Zhigang Ma<sup>4</sup>, Haijuan He<sup>1</sup>, Xiaolong Yu<sup>1</sup> and Fanghong Hu<sup>6</sup>**

<sup>1</sup> Heilongjiang Academy of Agricultural Sciences, Animal Husbandry Research  
Institute, No. 368 Xuefu Road, Harbin 150086, P.R. China

<sup>2</sup> Department of Animal Science, School of Agriculture and Biology, Shanghai Jiao  
Tong University; Shanghai Key Laboratory of Veterinary Biotechnology, Shanghai  
200240, P.R. China

<sup>3</sup> Hainan Academy of Agricultural Sciences, Institute of Animal Science and  
Veterinary Medicine, 14 Xingdan Road, Qionghua District, Haikou, 570203, P.R.  
China

<sup>4</sup> Heilongjiang Academy of Agricultural Sciences, Qiqihar Branch Academy, No. 2  
Heyi Road, Qiqihar 161005, P.R. China

<sup>5</sup> College of Animal Science and Technology, Anhui Agricultural University, No. 130  
Changjiangxi Road, Hefei, 230036, P.R. China

<sup>6</sup> Agricultural and Rural Bureau, Longhexi Road, Liuan, 237006, P.R. China

Submitted: March 15, 2021. Final revision received: June 28, 2021. Accepted: August  
30, 2021

\* Zhenhua Guo and Guojun Liu contributed equally to this work and are considered equal first authors.

\*\* Corresponding authors; e-mails: gzhh00@163.com / liudi1963@163.com / menghe@sjtu.edu.cn

\*\*\* ORCID: 0000-0003-0592-5988

## Supplementary material

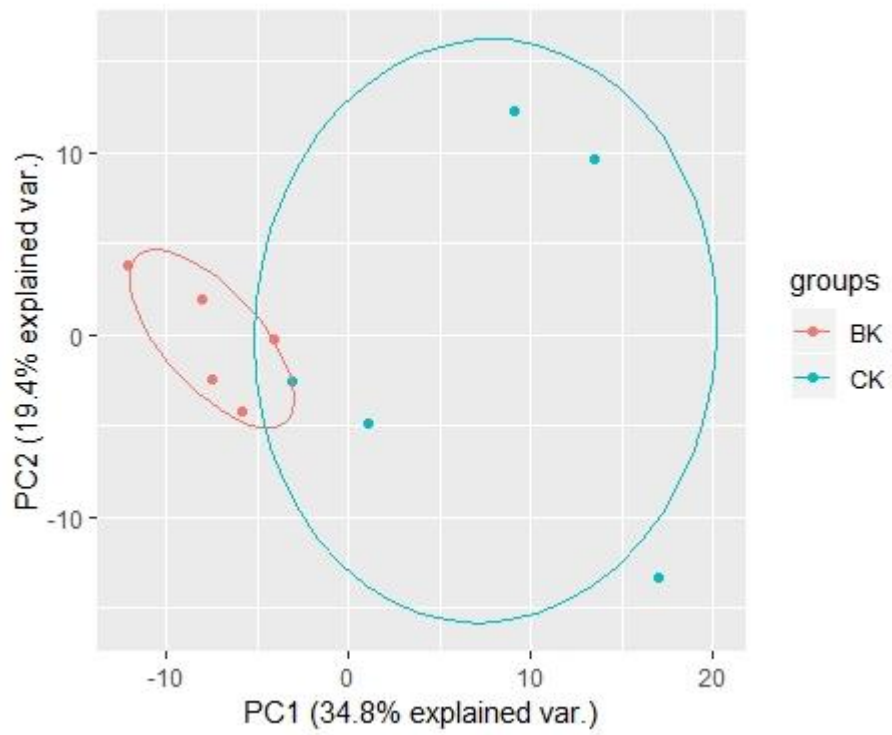

(A)

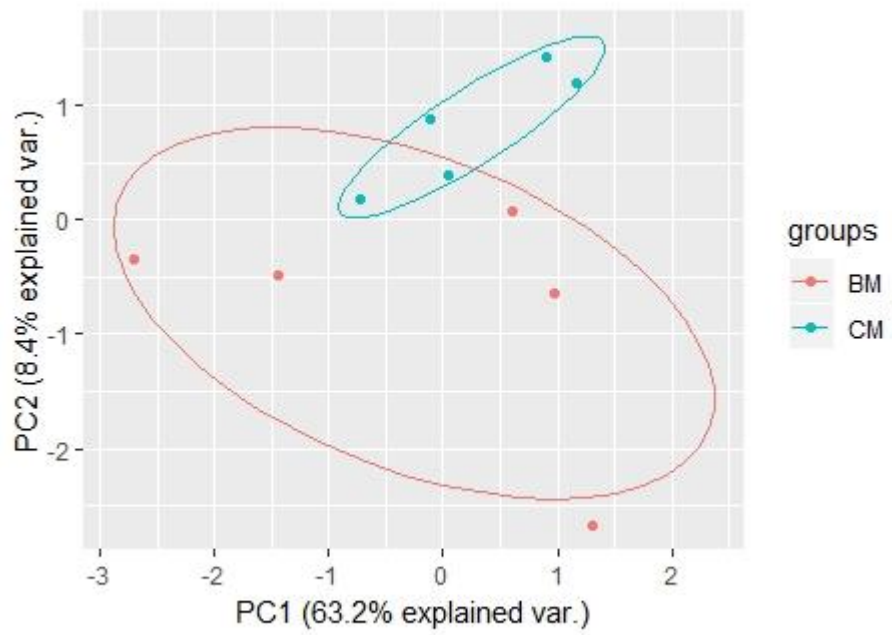

(B)

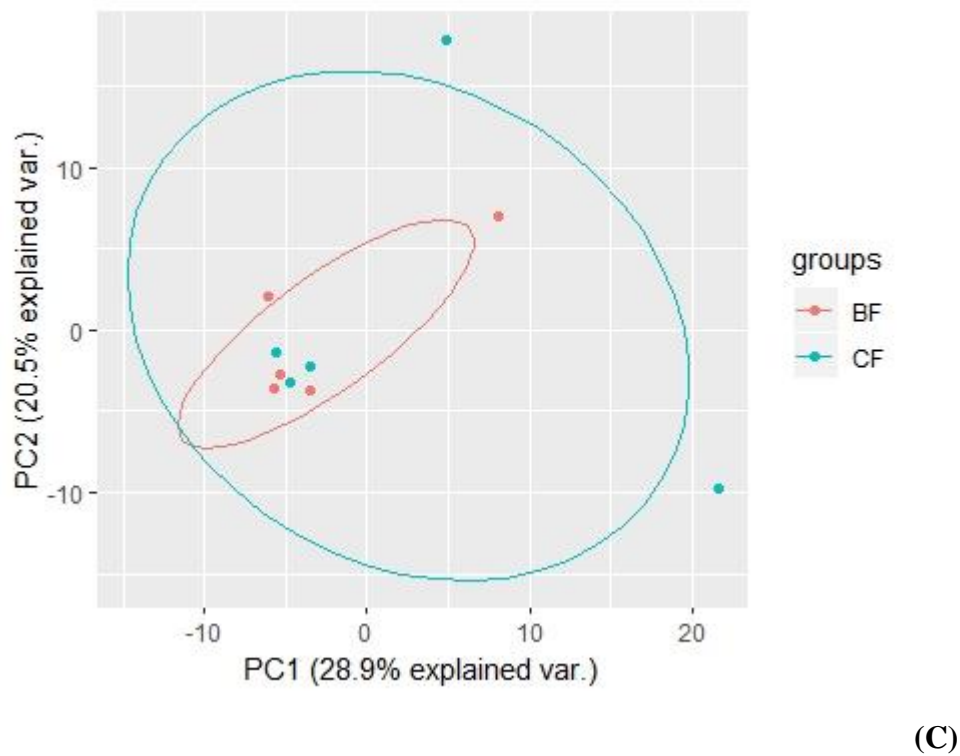

**Figure S1.** Genus-level microorganism principal components analysis (PCA).

Jejunum (A), cecum (B), and manure (C).

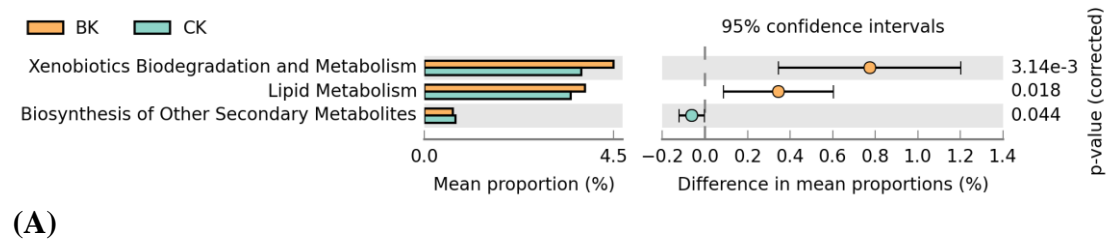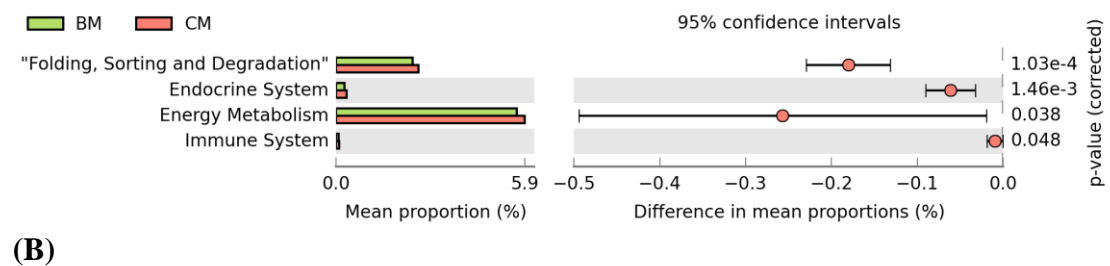

**Figure S2.** Second functional groups with different metabolism of gut microbiota.

Jejunum (A) and cecum (B).

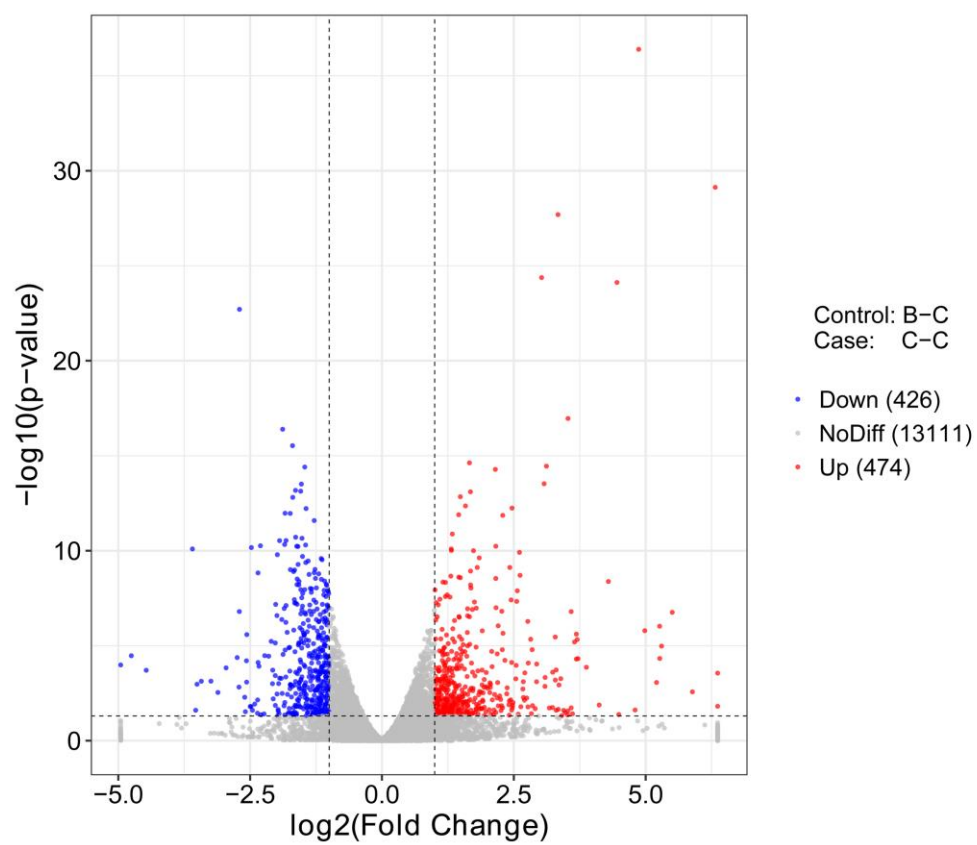

(A)

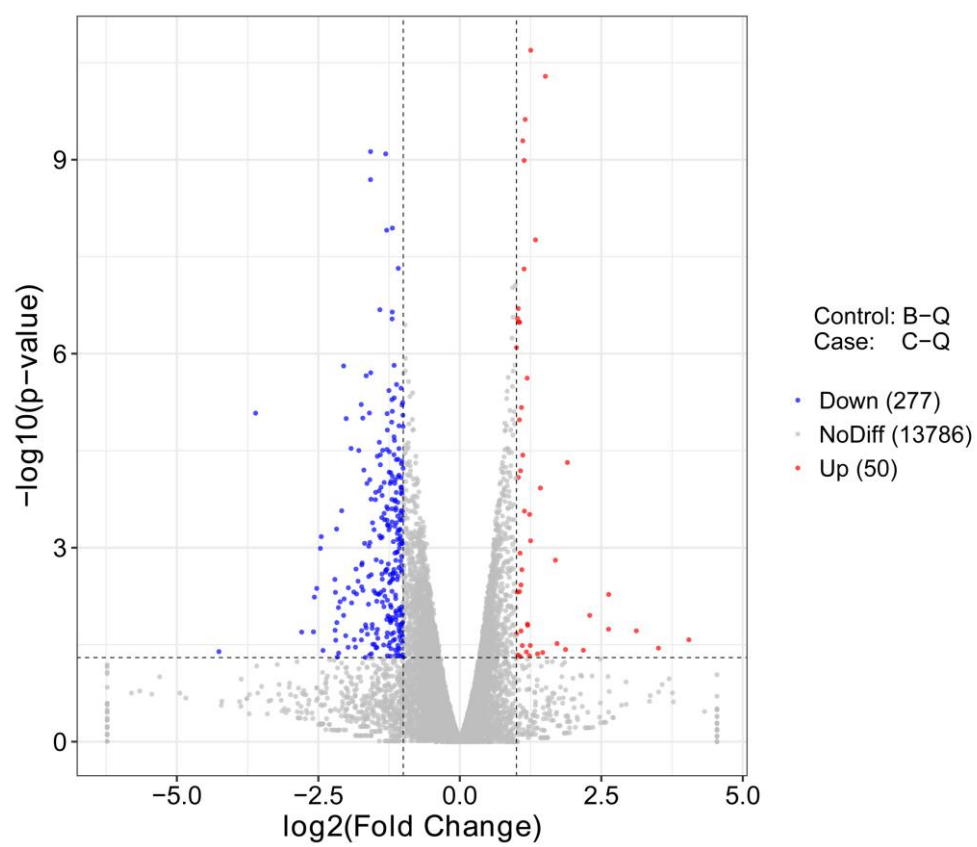

(B)

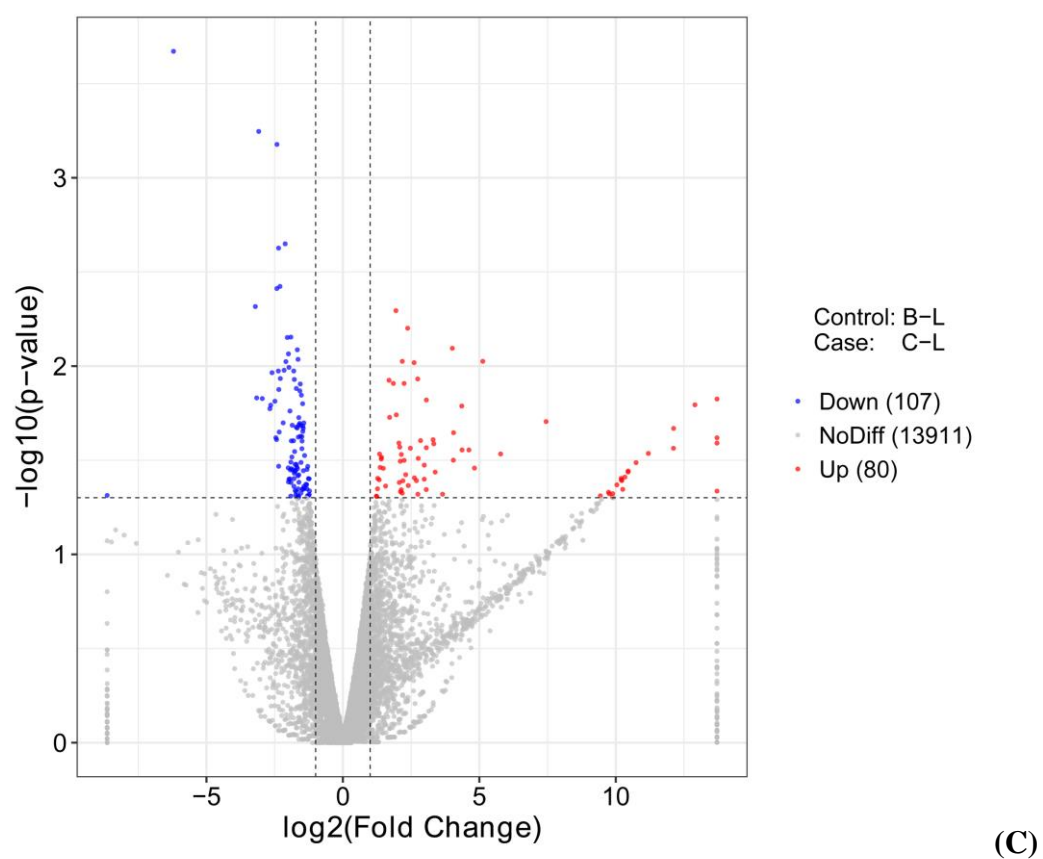

**Figure S3.** Volcano map of differentially expressed genes in pituitary, thalamus, and ovary. (A) Pituitary; (B) thalamus; (C) ovary. The two vertical dashed lines in the figure are twice the difference threshold; the horizontal dashed line is the threshold for the  $P$  value,  $P = 0.05$ .

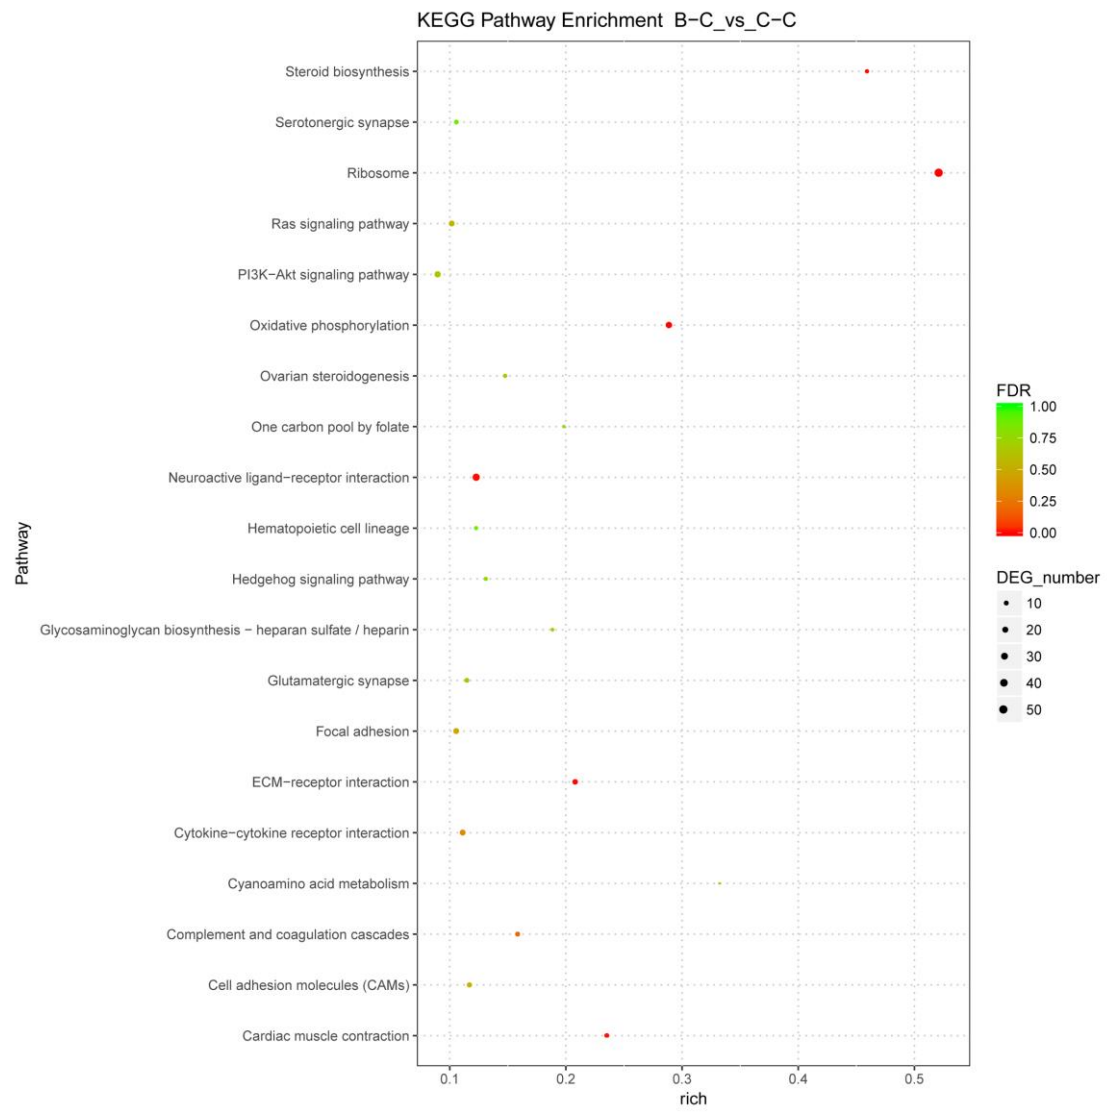

(A)

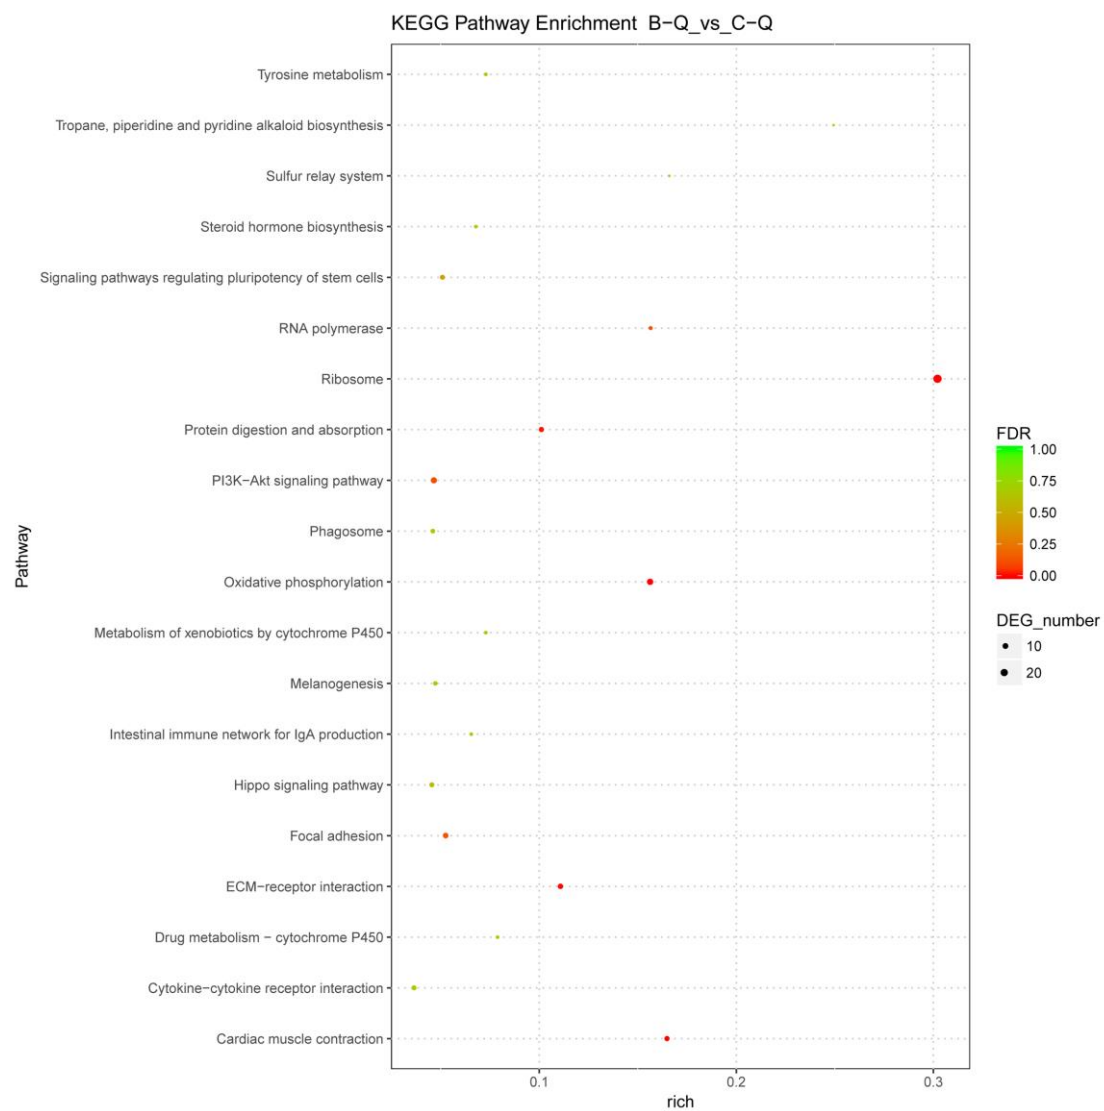

(B)

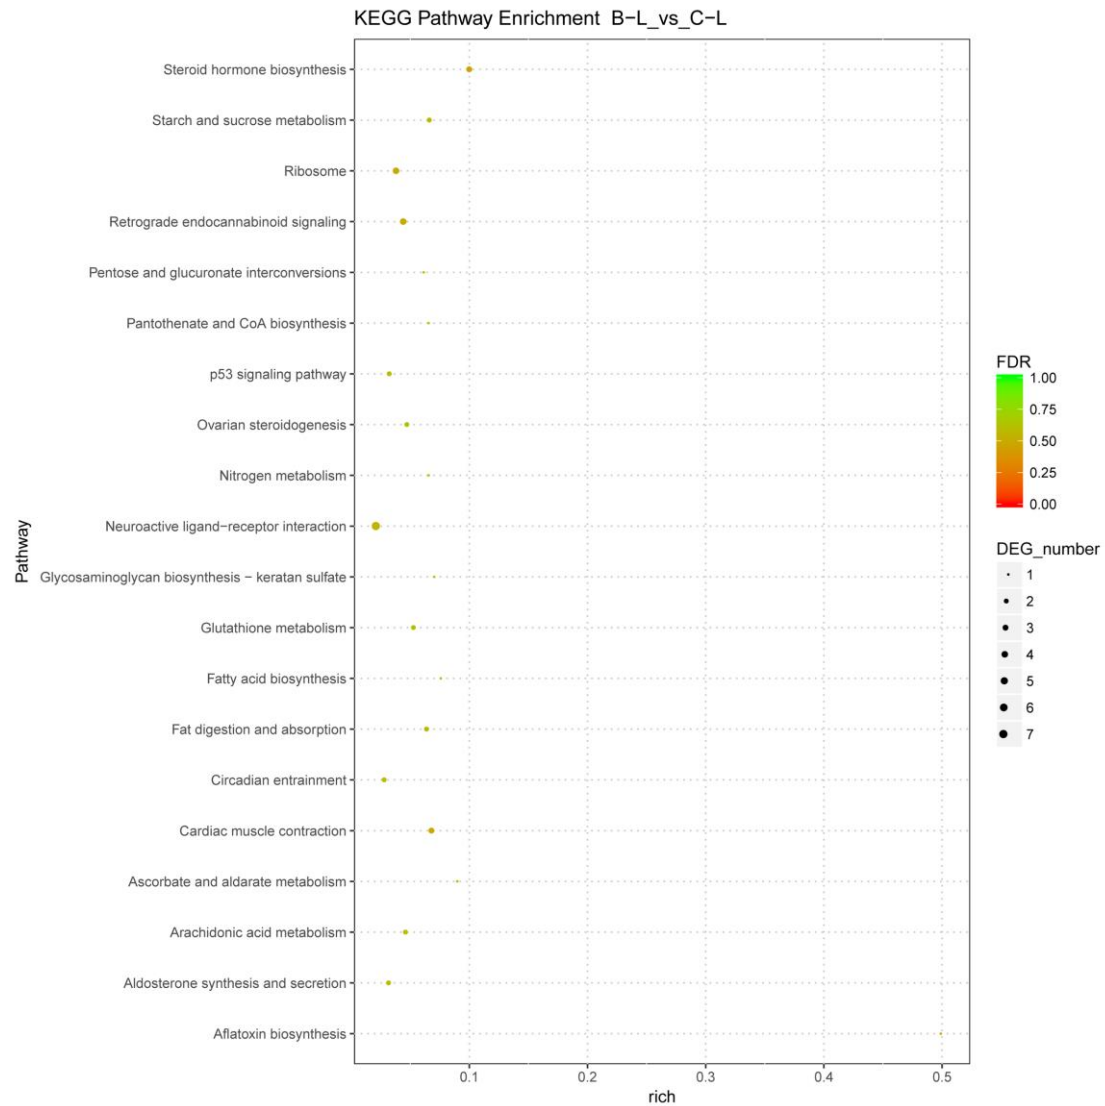

(C)

**Figure S4.** KEGG (Kyoto Encyclopedia of Genes and Genomes) diacylglycerol (DAG) enrichment analysis. Figure S4A shows the pituitary significantly different KEGG pathways: (1) ribosome, majority in downregulated genes; (2) oxidative phosphorylation, majority in downregulated genes; (3) extracellular matrix (ECM)–receptor interaction, majority in upregulated genes; (4) steroid biosynthesis, majority in upregulated genes; (5) neuroactive ligand–receptor interaction, majority in upregulated genes; (6) cardiac muscle contraction, majority in downregulated genes. Figure S4B shows the significantly different KEGG pathways in the thalamus: (1)



ribosome, majority in downregulated genes; (2) oxidative phosphorylation, majority in downregulated genes; (3) cardiac muscle contraction, majority in downregulated genes; (4) ECM–receptor interaction, majority in downregulated genes; (5) protein digestion and absorption, majority of downregulated genes. Figure S4C shows that the ovary does not have any significantly different KEGG pathways.
